# Supplementary material
Source: PubMed Central journal article supplement (PMC4143071)
Supplement: 1410183111_pnas.201410183SI.pdf [file 1410183111_pnas.201410183SI.pdf]

# Supporting Information

Marzocchi and Jordan 10.1073/pnas.1410183111

## SI Text

### Glossary

This glossary contains definitions of new and uncommon terms, including references that document the definitions when available.

**Aleatory Variability.** Intrinsic randomness of the system (1). In the uncertainty hierarchy, it is the event frequency defined by the experimental concept.

**Bayesian Model Checking.** The part of Bayesian data analysis concerned with the fit of the model to the data and our substantive knowledge (2).

**Epistemic Uncertainty.** The lack of knowledge about a system (1). In the uncertainty hierarchy, it is the modeling uncertainty in the event frequency, where the latter is defined by the experimental concept.

**Exceedance Probability.** A value of the survival function. In probabilistic seismic hazard analysis, the probability that the ground shaking will be larger than some intensity value at a particular geographic site over a time interval of interest (3).

**Exchangeability.** A property that the joint probability distribution of a data set is invariant with respect to permutations in the data ordering (4).

**Experimental Concept.** The specification of collections of data, observed and not yet observed, that are judged to be exchangeable when conditioned on a set of explanatory variables. The experimental concept defines the uncertainty hierarchy.

**Experts' Distribution.** A discrete set of estimates of the event frequency defined by the experimental concept and the relative

plausibilities of those estimates, based in part on expert (subjective) assessment.

**Extended Experts' Distribution.** The continuous probability distribution sampled by the discrete experts' distribution, used to set up the ontological hypothesis.

**Forecasting Model Validation.** The procedure by which we decide that a model forecasts the data-generating process well enough to be sufficiently reliable for some useful purpose.

**Ontological Error.** An error in a model's quantification of the aleatory variability and epistemic uncertainty, as defined by the experimental concept.

**Ontological Hypothesis.** A statistical null hypothesis that the event frequency defined by the experimental concept is a sample from the extended experts' distribution. The rejection of the ontological hypothesis exposes an ontological error.

**Posterior Predictive Model Checking.** Bayesian model checking that tests the posterior model distribution against the data (2).

**Prior Predictive Model Checking.** Bayesian model checking that tests the prior model distribution against the data (2).

**Severe Test.** Statistical test that, if the null hypothesis is false, has a high probability of yielding a bad fit to the data and a low probability of yielding a good fit (5).

**Uncertainty Hierarchy.** Levels of uncertainty, from aleatory variability to epistemic uncertainty to ontologic error, defined by the experimental concept.

1. Goldstein M (2013) Observables and models: Exchangeability and the inductive argument. *Bayesian Theory and Its Applications*, eds Damien P, Dellaportas P, Olson NG, Stephens DA (Oxford Univ Press, Oxford, UK), pp 3–18.
2. Gelman A, Carlin JB, Stern HS, Rubin DB (2003) *Bayesian Data Analysis* (Chapman & Hall/CRC, London), 2nd Ed.

3. Cornell CA (1968) Engineering seismic risk analysis. *Bull Seismol Soc Am* 58(5):1583–1606.
4. Draper D, Hodges JS, Mallows CL, Pregibon D (1993) Exchangeability and data analysis. *J R Stat Soc Ser A Stat Soc* 156(1):9–37.
5. Mayo DG (1996) *Error and the Growth of Experimental Knowledge* (Univ of Chicago Press, Chicago).
